# Supplementary material for: Loneliness and Increased Hazardous Alcohol Use: Data from a Nationwide Internet Survey with 1-Year Follow-Up
Source: MDPI journal article supplement (doi:10.3390/ijerph191912086), 2022-09-24
Supplement: s1 [file s1]

Supplementary Figure S1. The flow diagram of the study population

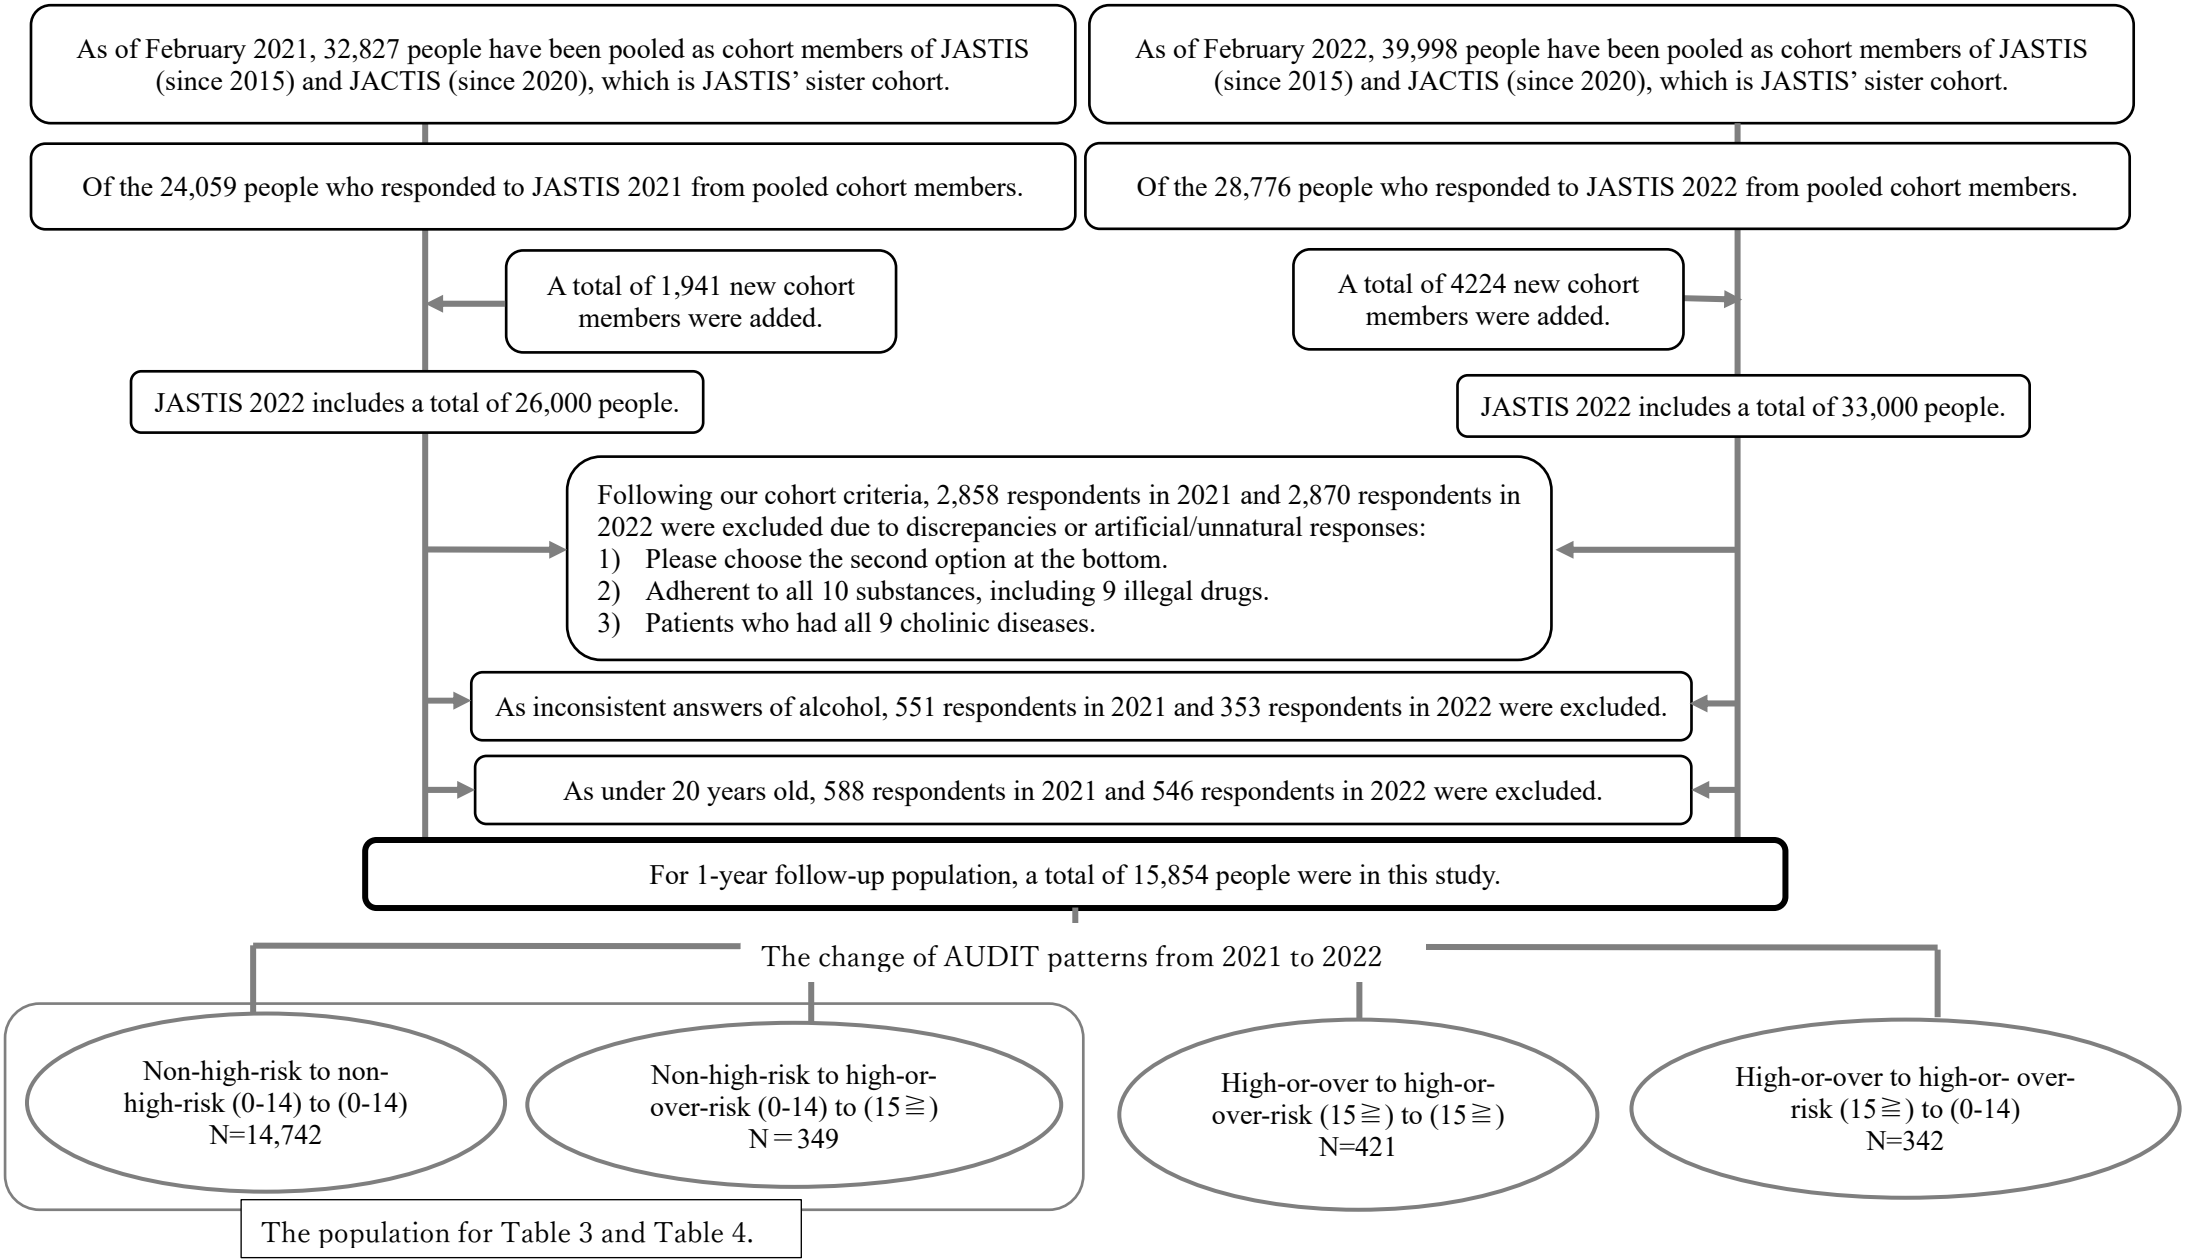

Caption  
Figure S1. The flow diagram of the study population  
The figure shows the steps used in the selection of the members of this study. Information on the two cohort studies is available on the website: JASTIS (<https://jastis-study.jp/>), and JACSIS (<https://jacsis-study.jp/index.html>).

Supplementary Table S1. AUDIT questions and each score of answers

|                                                                                                                                      | 0      | 1                                                                                    | 2                             | 3                                                                                     | 4                         |
|--------------------------------------------------------------------------------------------------------------------------------------|--------|--------------------------------------------------------------------------------------|-------------------------------|---------------------------------------------------------------------------------------|---------------------------|
| 1. How often do you have a drink containing alcohol?                                                                                 | Never  | Monthly or less                                                                      | 2 to 4 times a month          | 2 to 3 times a week                                                                   | 4 or more times a week    |
| 2. How many drinks containing alcohol do you have on a typical day when you are drinking?                                            | 1 or 2 | 3 or 4                                                                               | 5 or 6                        | 7, 8, or 9                                                                            | 10 or more                |
| 3. How often do you have six or more drinks on one occasion?                                                                         | Never  | Less than monthly                                                                    | Monthly                       | Weekly                                                                                | Daily or almost daily     |
| 4. How often during the last year have you found that you were not able to stop drinking once you had started?                       | Never  | Less than monthly                                                                    | Monthly                       | Weekly                                                                                | Daily or almost daily     |
| 5. How often during the last year have you failed to do what was normally expected from you because of drinking?                     | Never  | Less than monthly                                                                    | Monthly                       | Weekly                                                                                | Daily or almost daily     |
| 6. How often during the last year have you needed a first drink in the morning to get yourself going after a heavy drinking session? | Never  | Less than monthly                                                                    | Monthly                       | Weekly                                                                                | Daily or almost daily     |
| 7. How often during the last year have you had a feeling of guilt or remorse after drinking?                                         | Never  | Less than monthly                                                                    | Monthly                       | Weekly                                                                                | Daily or almost daily     |
| 8. How often during the last year have you been unable to remember what happened the night before because you had been drinking?     | Never  | Less than monthly                                                                    | Monthly                       | Weekly                                                                                | Daily or almost daily     |
| 9. Have you or someone else been injured as a result of your drinking?                                                               | No     | 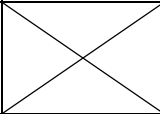 | Yes, but not in the last year |  | Yes, during the last year |
| 10. Has a relative or friend or a doctor or another health worker been concerned about your drinking or suggested you cut down?      | No     |  | Yes, but not in the last year |  | Yes, during the last year |

Supplementary Table S2. The scale score of our study based on the 3-item of the University of California, Los Angeles Loneliness Scale version 3, UCLA-LS3 (SF-3), and the original score scale on JASTIS questionnaire

|                                                       | The scale score in our study based on UCLA-LS3 (SF-3) |        |                  |         |        |
|-------------------------------------------------------|-------------------------------------------------------|--------|------------------|---------|--------|
|                                                       | Hardly ever                                           |        | Some of the time | Often   |        |
| 1. How often do you feel that you lack companionship? | 1                                                     |        | 2                | 3       |        |
| 2. How often do you feel left out?                    | 1                                                     |        | 2                | 3       |        |
| 3. How often do you feel isolated from others?        | 1                                                     |        | 2                | 3       |        |
| The original score scale on JASTIS 2021               | 1                                                     | 2      | 3                | 4       | 5      |
|                                                       | Never                                                 | Rarely | Sometime         | Usually | Always |

Supplementary Table S3. The four patterns of AUDIT categories' changes and their characteristics based on 2021  
(The two patterns were shown in Table 3.)

|                                                       | The change of AUDIT patterns from 2021 to 2022 (N=15,854) |                                                            |                                                                   |                                                            |
|-------------------------------------------------------|-----------------------------------------------------------|------------------------------------------------------------|-------------------------------------------------------------------|------------------------------------------------------------|
|                                                       | Non-high-risk<br>to non-high-risk<br>(0-14) to (0-14)     | Non-high-risk<br>to high or over<br>(0-14) to (15 $\geq$ ) | Over-high-risk<br>to high or over<br>(15 $\geq$ ) to (15 $\geq$ ) | High or over to<br>non-high-risk<br>(15 $\geq$ ) to (0-14) |
|                                                       | N = 14,742                                                | N = 349                                                    | N = 421                                                           | N = 342                                                    |
|                                                       | N (%)                                                     | N (%)                                                      | N (%)                                                             | N (%)                                                      |
| Loneliness(Mean, SD)                                  | 4.0( $\pm$ 1.8)                                           | 4.4( $\pm$ 1.9)                                            | 5.0( $\pm$ 2.2)                                                   | 4.7( $\pm$ 2.1)                                            |
| Score $\leq$ 6                                        | 11,918(81)                                                | 254(73)                                                    | 258(61)                                                           | 218(64)                                                    |
| Score $\geq$ 6                                        | 2,824(19)                                                 | 95(27)                                                     | 163(39)                                                           | 124(36)                                                    |
| Age, year (Mean, SD)                                  | 53.0( $\pm$ 15.7)                                         | 49.9( $\pm$ 14.5)                                          | 49.2( $\pm$ 15.0)                                                 | 46.9( $\pm$ 16.4)                                          |
| 20 – 39 years                                         | 3,246(22)                                                 | 91(26)                                                     | 85(20)                                                            | 91(27)                                                     |
| 40 – 59 years                                         | 5,695(39)                                                 | 160(46)                                                    | 235(56)                                                           | 156(46)                                                    |
| 60 – 79 years                                         | 5,801(39)                                                 | 98(28)                                                     | 101(24)                                                           | 95(28)                                                     |
| Sex                                                   |                                                           |                                                            |                                                                   |                                                            |
| Women                                                 | 7,382(50)                                                 | 67(19)                                                     | 89(21)                                                            | 77(23)                                                     |
| Men                                                   | 7,360(50)                                                 | 282(81)                                                    | 332(79)                                                           | 265(77)                                                    |
| Education                                             |                                                           |                                                            |                                                                   |                                                            |
| Low                                                   | 4,561(31)                                                 | 86(25)                                                     | 147(35)                                                           | 105(31)                                                    |
| Middle                                                | 3,173(22)                                                 | 71(20)                                                     | 53(13)                                                            | 45(13)                                                     |
| High                                                  | 7,008(48)                                                 | 192(55)                                                    | 221(52)                                                           | 192(56)                                                    |
| Marital status                                        |                                                           |                                                            |                                                                   |                                                            |
| Marriage                                              | 9,398(64)                                                 | 233(67)                                                    | 272(65)                                                           | 218(64)                                                    |
| No marriage                                           | 3,810(26)                                                 | 83(24)                                                     | 99(24)                                                            | 93(27)                                                     |
| Divorced/Widowed                                      | 1,534(10)                                                 | 33(9)                                                      | 50(12)                                                            | 31(9)                                                      |
| Living arrangements                                   |                                                           |                                                            |                                                                   |                                                            |
| Living with someone                                   | 11,987(81)                                                | 274(79)                                                    | 325(77)                                                           | 263(77)                                                    |
| Living alone                                          | 2,755(19)                                                 | 75(21)                                                     | 96(23)                                                            | 79(23)                                                     |
| Job                                                   |                                                           |                                                            |                                                                   |                                                            |
| Regular job                                           | 6,093(41)                                                 | 215(62)                                                    | 278(66)                                                           | 237(69)                                                    |
| No-regular employee                                   | 2,800(19)                                                 | 56(16)                                                     | 64(15)                                                            | 44(13)                                                     |
| No main income job as students<br>/retiree/ housework | 3,716(25)                                                 | 37(11)                                                     | 24(6)                                                             | 21(6)                                                      |
| Unemployed                                            | 2,133(14)                                                 | 41(12)                                                     | 55(13)                                                            | 40(12)                                                     |
| Income                                                |                                                           |                                                            |                                                                   |                                                            |
| Under 2 million yen                                   | 2,366(16)                                                 | 51(15)                                                     | 65(15)                                                            | 55(16)                                                     |
| 2-4 million yen                                       | 5,354(36)                                                 | 137(39)                                                    | 158(38)                                                           | 120(35)                                                    |
| 4-6 million yen                                       | 2,342(16)                                                 | 61(17)                                                     | 83(20)                                                            | 64(19)                                                     |
| 6-10 million yen                                      | 1,477(10)                                                 | 55(16)                                                     | 66(16)                                                            | 52(15)                                                     |
| 10 million or more                                    | 327(2)                                                    | 7(2)                                                       | 19(5)                                                             | 14(4)                                                      |
| Don't know/want to answer                             | 2,876(20)                                                 | 38(11)                                                     | 30(7)                                                             | 37(11)                                                     |
| Current smoker                                        |                                                           |                                                            |                                                                   |                                                            |
| No                                                    | 12,075(82)                                                | 230(66)                                                    | 250(59)                                                           | 208(61)                                                    |
| Yes                                                   | 2,667(18)                                                 | 119(34)                                                    | 171(41)                                                           | 134(39)                                                    |
| Phycological distress (Mean, SD)                      | 4.4( $\pm$ 5.4)                                           | 6.0( $\pm$ 6.2)                                            | 7.3( $\pm$ 6.7)                                                   | 7.3( $\pm$ 6.5)                                            |
| K6 < 13                                               | 13,370(91)                                                | 299(86)                                                    | 331(79)                                                           | 268(78)                                                    |
| K6 $\geq$ 13                                          | 1,372(9)                                                  | 50(14)                                                     | 90(21)                                                            | 74(22)                                                     |

Supplementary Table S4. The percentage and means of loneliness score in each AUDIT item among follow-up populations

|    | AUDIT items†                             | Loneliness<br>( $\geq 6$ )<br>N=3,949 | Loneliness<br>score<br>N=15,854 |                  |
|----|------------------------------------------|---------------------------------------|---------------------------------|------------------|
|    | Harmful alcohol use                      | <b>n (%)</b>                          | <b>Mean (SD)</b>                | Bonferroni test* |
| Q1 | Frequency of drinking                    |                                       |                                 |                  |
|    | 0 (Non-drinker)                          | 1050(33)                              | 4.16( $\pm 1.89$ )              | 0>3, 0>4         |
|    | 1 (Monthly or less)                      | 658(21)                               | 4.19( $\pm 1.91$ )              | 1>3, 1>4         |
|    | 2 (2-4 times a month)                    | 461(14)                               | 4.10( $\pm 1.88$ )              |                  |
|    | 3 (2-3 times a week)                     | 379(12)                               | 4.02( $\pm 1.77$ )              | 3>4              |
|    | 4 (4 or more times a week)               | 658(21)                               | 3.86( $\pm 1.66$ )              |                  |
| Q2 | Typical quantity on a day                |                                       |                                 |                  |
|    | 0 (1 or 2)                               | 1267(40)                              | 3.99( $\pm 1.78$ )              |                  |
|    | 1 (3 or 4)                               | 502(16)                               | 4.02( $\pm 1.78$ )              |                  |
|    | 2 (5 or 6)                               | 210(7)                                | 4.01( $\pm 1.75$ )              |                  |
|    | 3 (7 or 9)                               | 66(2)                                 | 4.02( $\pm 1.80$ )              |                  |
|    | 4 (10 or more)                           | 111(3)                                | 4.43( $\pm 2.14$ )              | 4>0, 4>2, 4>3    |
| Q3 | Frequency of heavy drinking              |                                       |                                 |                  |
|    | 0 (Never)                                | 1363(43)                              | 3.97( $\pm 1.76$ )              |                  |
|    | 1 (Less than monthly)                    | 339(11)                               | 4.06( $\pm 1.83$ )              |                  |
|    | 2 (Monthly)                              | 144(4)                                | 4.25( $\pm 1.86$ )              | 2>0              |
|    | 3 (Weekly)                               | 155(5)                                | 4.14( $\pm 1.89$ )              |                  |
|    | 4 (Daily or almost daily)                | 155(5)                                | 4.09( $\pm 1.88$ )              |                  |
|    | Symptom of disease                       |                                       |                                 |                  |
| Q4 | Impaired control over drinking           |                                       |                                 |                  |
|    | 0 (Never)                                | 1772(55)                              | 3.94( $\pm 1.73$ )              |                  |
|    | 1 (Less than monthly)                    | 165(5)                                | 4.55( $\pm 2.07$ )              | 1>0              |
|    | 2 (Monthly)                              | 105(3)                                | 4.98( $\pm 2.08$ )              | 2>0, 2>1         |
|    | 3 (Weekly)                               | 61(2)                                 | 5.13( $\pm 2.24$ )              | 3>0, 3>1         |
|    | 4 (Daily or almost daily)                | 53(2)                                 | 4.76( $\pm 2.29$ )              | 4>0              |
| Q5 | Increased fail to do because of drinking |                                       |                                 |                  |
|    | 0 (Never)                                | 1772(55)                              | 3.94( $\pm 1.73$ )              |                  |
|    | 1 (Less than monthly)                    | 165(5)                                | 4.53( $\pm 2.11$ )              | 1>0              |
|    | 2 (Monthly)                              | 105(3)                                | 5.07( $\pm 2.09$ )              | 2>0, 2>1         |
|    | 3 (Weekly)                               | 61(2)                                 | 4.85( $\pm 2.21$ )              | 3>0              |
|    | 4 (Daily or almost daily)                | 53(2)                                 | 4.92( $\pm 2.37$ )              | 4>0              |
| Q6 | Morning drinking                         |                                       |                                 |                  |
|    | 0 (Never)                                | 1912(60)                              | 3.96( $\pm 1.75$ )              |                  |
|    | 1 (Less than monthly)                    | 86(3)                                 | 4.93( $\pm 2.25$ )              | 1>0              |
|    | 2 (Monthly)                              | 79(2)                                 | 5.63( $\pm 2.04$ )              | 2>0, 2>1, 2>4    |

|     |                                      |          |             |          |
|-----|--------------------------------------|----------|-------------|----------|
|     | 3 (Weekly)                           | 41(1)    | 5.30(±2.33) | 3>0      |
|     | 4 (Daily or almost daily)            | 38(1)    | 4.86(±2.30) | 4>0      |
|     | Harmful alcohol use                  |          |             |          |
| Q7  | Guilt after drinking                 |          |             |          |
|     | 0 (Never)                            | 1730(54) | 3.92(±1.72) |          |
|     | 1 (Less than monthly)                | 183(6)   | 4.54(±2.04) | 1>0      |
|     | 2 (Monthly)                          | 107(3)   | 5.20(±2.20) | 2>0, 2>1 |
|     | 3 (Weekly)                           | 82(3)    | 5.70(±2.28) | 3>0, 3>1 |
|     | 4 (Daily or almost daily)            | 54(2)    | 5.27(±2.38) | 4>0, 4>1 |
| Q8  | Blackouts                            |          |             |          |
|     | 0 (Never)                            | 1757(55) | 3.95(±1.75) |          |
|     | 1 (Less than monthly)                | 171(5)   | 4.23(±1.89) | 1>0      |
|     | 2 (Monthly)                          | 110(3)   | 4.78(±2.09) | 2>0, 2>1 |
|     | 3 (Weekly)                           | 63(2)    | 5.00(±2.16) | 3>0, 3>1 |
|     | 4 (Daily or almost daily)            | 55(2)    | 5.15(±2.38) | 4>0, 4>1 |
| Q9  | Alcohol-related injuries             |          |             |          |
|     | 0 (No)                               | 1917(60) | 3.97(±1.76) |          |
|     | 2 (Yes, but not in the past year)    | 192(6)   | 4.57(±2.07) | 2>0      |
|     | 4 (Yes, during the past year)        | 47(1)    | 4.95(±2.22) | 4>0      |
| Q10 | Others concerned about your drinking |          |             |          |
|     | 0 (No)                               | 1870(58) | 3.98(±1.76) |          |
|     | 2 (Yes, but not in the past year)    | 179(6)   | 4.51(±2.01) | 2>0      |
|     | 4 (Yes, during the past year)        | 107(3)   | 4.26(±1.97) | 4>0      |

† The detailed questionnaire of each AUDIT item was shown in Supplementary Table S1.

\*Significant item categories were shown ( $p<0.05$ ).
